# Supplementary material
Source: publisher figshare collection journal article supplement (https://sage.figshare.com/ndownloader/files/17947706)
Supplement: Supplementary file 1 [file 17947706]

---

**Appendix 1: Summary of selected papers**

---

| <b>Author(s)</b>          | <b>Aim</b>                                                                                                                                                                                                     | <b>Design</b>            | <b>Participants and samples</b>                             | <b>Theme(s)</b>                                                       |
|---------------------------|----------------------------------------------------------------------------------------------------------------------------------------------------------------------------------------------------------------|--------------------------|-------------------------------------------------------------|-----------------------------------------------------------------------|
| Aarsland et al<br>(2009)  | To discuss the epidemiology, clinical course, diagnosis, and management of some of the most common neuropsychiatric symptoms in Parkinson Disease: depression, anxiety, apathy, fatigue and psychotic symptoms | Literature review        | Unknown                                                     | Relevant data and diagnostic activities<br>Diagnoses<br>Interventions |
| Buccheri et al.<br>(2013) | To describe a tested practice model for teaching self-management of unpleasant auditory hallucinations                                                                                                         | Theoretical essay        | N/A                                                         | Relevant data and diagnostic activities<br>Diagnoses<br>Interventions |
| Buffum et al.<br>(2009)   | To evaluate the implementation of a 10-session behavioural management course for self-management of auditory hallucinations in patients with schizophrenia                                                     | Quasi-experimental study | (n = 32) patients within the Department of Veterans Affairs | Relevant data and diagnostic activities<br>Interventions              |
| Burghaus et al.<br>(2012) | To review the prevalence, incidence, pathogenetic concepts and treatment guidelines of neurodegenerative diseases                                                                                              | Literature review        | Unknown                                                     | Relevant data and diagnostic activities<br>Diagnoses<br>Interventions |

---

---

|                                  |                                                                                                                                                                                                                                                                                   |                                                     |                                                                                                                                                                       |                                                                       |
|----------------------------------|-----------------------------------------------------------------------------------------------------------------------------------------------------------------------------------------------------------------------------------------------------------------------------------|-----------------------------------------------------|-----------------------------------------------------------------------------------------------------------------------------------------------------------------------|-----------------------------------------------------------------------|
|                                  | and their association with hallucination.                                                                                                                                                                                                                                         |                                                     |                                                                                                                                                                       |                                                                       |
| Chadwick & Hemingway (2017/2018) | To critically appraise the most recent evidence regarding the effectiveness of investigating the content and meaning of visual hallucinations as a one-to-one therapeutic intervention, and to examine whether and how it can be incorporated into mental health nursing practice | Narrative Review                                    | (n = 5) papers selected for review                                                                                                                                    | Relevant data and diagnostic activities<br>Diagnoses<br>Interventions |
| Chaix et al. (2014)              | To replicate in a French-speaking context previous studies about safety-seeking behaviours and verbal auditory hallucinations in schizophrenia                                                                                                                                    | Cross-sectional study                               | (n = 28) ambulatory patients followed by the Department of Psychiatry at the Lausanne-Vaud University Hospital and the HorizonSud Foundation in Marsens, Switzerland. | Relevant data and diagnostic activities<br>Diagnoses<br>Interventions |
| Coffey & Hewitt (2008)           | To explore service user and community mental health nurses' views on responses to voice hearing experiences                                                                                                                                                                       | Thematic content analysis of exploratory interviews | (n = 20) community mental health nurses and (n = 20) service users                                                                                                    | Relevant data and diagnostic activities<br>Diagnoses<br>Interventions |

---

---

|                           |                                                                                                                                                                                                                                                                                            |                                      |                                                                |                                                                       |
|---------------------------|--------------------------------------------------------------------------------------------------------------------------------------------------------------------------------------------------------------------------------------------------------------------------------------------|--------------------------------------|----------------------------------------------------------------|-----------------------------------------------------------------------|
| Dechamps et al.<br>(2008) | To explore and determine the clinical figures of behavioural syndromes from the factor structure of the Neuropsychiatric Inventory-Nursing Home version (NPI-NH) in demented and psychotic patients                                                                                        | Observational, cross-sectional study | (n = 163) institutionalised elderly with dementia or psychosis | Relevant data and diagnostic activities                               |
| England (2008)            | To assess efficacy of time-limited usual psychiatric care + cognitive nursing Intervention in a sample of voice hearers assigned a label of schizophrenia or schizoaffective disorder                                                                                                      | Randomised controlled trial          | (n = 65) community-dwelling voice hearers' patients            | Relevant data and diagnostic activities<br>Diagnoses<br>Interventions |
| Gerlock et al.<br>(2010)  | To describe the implementation of the Harm Command Safety Protocol and the Unpleasant Voices Scale to respond to command hallucinations to harm in the context of the dissemination of a multisite, evidence-based behavioural management course for patients with auditory hallucinations | Experience report                    | Unknown                                                        | Relevant data and diagnostic activities<br>Diagnoses<br>Interventions |
| Goetz (2010)              | Unknown                                                                                                                                                                                                                                                                                    | Literature review                    | Unknown                                                        |                                                                       |

---

---

|                      |                                                                                                                                                                                                                                                                         |                             |                                                                                                              |                                                                       |
|----------------------|-------------------------------------------------------------------------------------------------------------------------------------------------------------------------------------------------------------------------------------------------------------------------|-----------------------------|--------------------------------------------------------------------------------------------------------------|-----------------------------------------------------------------------|
|                      |                                                                                                                                                                                                                                                                         |                             |                                                                                                              | Relevant data and diagnostic activities<br>Diagnoses                  |
| Haider (2012)        | Unknown                                                                                                                                                                                                                                                                 | Single case study<br>Review | A nonagenarian patient who started reporting hallucinations shortly after being admitted to a long-term care | Relevant data and diagnostic activities<br>Diagnoses<br>Interventions |
| Hazell et al (2017)  | To apply the Normalisation Process Theory model to a secondary mental health context, and test the model using exploratory factor analysis                                                                                                                              | Cross-sectional study       | (n = 201) mental health clinicians working in an NHS mental health trust in the South of England             | Interventions                                                         |
| Hazell et al. (2018) | This determine the extent to which symptom-specific cognitive behaviour therapy for voices can overcome the known barriers to accessing cognitive behaviour therapy for psychosis and whether any additional barriers are generated by cognitive behaviour therapy that | Literature review           | Unknown                                                                                                      | Relevant data and diagnostic activities<br>Diagnoses<br>Interventions |

---

---

|                        |                                                                                                                                                                                                                                                                                                            |                                    |                                                                            |                                                                       |
|------------------------|------------------------------------------------------------------------------------------------------------------------------------------------------------------------------------------------------------------------------------------------------------------------------------------------------------|------------------------------------|----------------------------------------------------------------------------|-----------------------------------------------------------------------|
|                        | specifically targets distressing voices                                                                                                                                                                                                                                                                    |                                    |                                                                            |                                                                       |
| Hughes (2013)          | To explore the current understanding of Charles Bonnet syndrome, its treatment and the role of mental health nurses in this area                                                                                                                                                                           | Literature review                  | (n = 21) articles                                                          | Relevant data and diagnostic activities<br>Diagnoses<br>Interventions |
| Kalhovde et al. (2013) | To contribute to the understanding of how people with mental illness experience hearing voices and sounds that others do not hear in daily life.                                                                                                                                                           | Hermeneutic phenomenological study | (n = 14) patients who had been hearing voices and sounds for 2 to 39 years | Relevant data and diagnostic activities<br>Diagnoses<br>Interventions |
| Khan et al. (2017)     | To review the most recent studies about the association of neuropsychiatric complications with Parkinson's disease<br><br>To highlight the epidemiology, diagnosis, pathophysiology, and treatment of the neuropsychiatric complications, with more emphasis on the pathophysiology of these complications | Literature review                  | (n = 244) articles                                                         | Relevant data and diagnostic activities<br>Diagnoses<br>Interventions |
| Lenka et al. (2015)    | To critically analyse the published studies on the structural and functional neuroimaging in Parkinson                                                                                                                                                                                                     | Literature review                  | (n = 21) articles                                                          | Relevant data and diagnostic activities<br>Diagnoses                  |

---

---

| Disease patients with visual hallucinations |                                                                                                                                                                                                                            |                             |                                                                                                               |                                                                       |
|---------------------------------------------|----------------------------------------------------------------------------------------------------------------------------------------------------------------------------------------------------------------------------|-----------------------------|---------------------------------------------------------------------------------------------------------------|-----------------------------------------------------------------------|
| Llebaria et al. (2010)                      | To explore the neuropsychological deficits associated with the different types of visual hallucinations observed in Parkinson Disease, from minor hallucinations to well-formed visual hallucinations with loss of insight | Prospective study           | (n= 57) Parkinson Disease patients (n = 29) with visual hallucinations (n = 29) without visual hallucinations | Relevant data and diagnostic activities<br>Diagnoses                  |
| Ma et al. (2016)                            | To explore social interactions, characteristics, and emotional behaviours to detect changes in auditory hallucinatory beliefs in patients with schizophrenia over a 3-month period                                         | Prospective follow-up study | (n = 189) patients with schizophrenia                                                                         | Relevant data and diagnostic activities<br>Diagnoses<br>Interventions |
| Martinez-Ramirez et al. (2016)              | Unknown                                                                                                                                                                                                                    | Literature review           | Unknown                                                                                                       | Relevant data and diagnostic activities<br>Diagnoses<br>Interventions |
| Mason et al. (2014)                         | 1) To identify theoretical underpinnings of malingering<br>2) To discuss interview and intervention techniques based on pertinent literature                                                                               | Literature review           | Unknown                                                                                                       | Relevant data and diagnostic activities<br>Diagnoses<br>Interventions |

---

---

3) To offer an organised mnemonic to help clinicians easily identify possible malingered psychosis presentations

|                               |                                                                                                                                                                       |                   |                                                                                                                                                              |                                                                       |
|-------------------------------|-----------------------------------------------------------------------------------------------------------------------------------------------------------------------|-------------------|--------------------------------------------------------------------------------------------------------------------------------------------------------------|-----------------------------------------------------------------------|
| Mosimann et al. (2008)        | To develop a reliable, valid, semi-structured interview for identifying and assessing visual hallucinations in older people with eye disease and cognitive impairment | Pilot study       | (n = 114) older people<br>(n = 80) with visual and/or cognitive impairment (patient group)<br>(n = 34) without known risks of hallucinations (control group) | Relevant data and diagnostic activities<br>Diagnoses                  |
| Papapetropoulos et al. (2008) | To quantify the type and presence of hallucinations in a clinic population while controlling for disease factors, depression, anxiety and medication                  | Pilot study       | (n = 70) Parkinson Disease patients                                                                                                                          | Relevant data and diagnostic activities<br>Diagnoses                  |
| Place et al. (2011)           | To get mental health nurses listening to voice hearers, by helping them to tell the story of their experience of voice hearing                                        | Experience report | Unknown                                                                                                                                                      | Relevant data and diagnostic activities<br>Diagnoses<br>Interventions |

---

|                             |                                                                                                                                                                                                                                                                                                                                                                                                                                                                                               |                                  |                                   |                                                                        |
|-----------------------------|-----------------------------------------------------------------------------------------------------------------------------------------------------------------------------------------------------------------------------------------------------------------------------------------------------------------------------------------------------------------------------------------------------------------------------------------------------------------------------------------------|----------------------------------|-----------------------------------|------------------------------------------------------------------------|
| Resnick et al.<br>(2017)    | <p>1) To determine if communities exposed to Evidence Integration Triangle for behavioural and psychological symptoms of dementia communities demonstrate evidence of implementation evaluated by the Reach, Effectiveness, Adoption, Implementation, and Maintenance criteria</p> <p>2) To evaluate the feasibility, utility, and cost of the Evidence Integration Triangle approach in Evidence Integration Triangle for behavioural and psychological symptoms of dementia communities</p> | Randomised clinical trial        | (n = 50) nursing home communities | <p>Relevant data and diagnostic activities Interventions</p>           |
| Roever et al.<br>(2012)     | Unknown                                                                                                                                                                                                                                                                                                                                                                                                                                                                                       | Literature review<br>Case report | Unknown                           | <p>Relevant data and diagnostic activities Diagnoses Interventions</p> |
| Sivec & Montesano<br>(2012) | To review the literature that addresses the effectiveness of Cognitive Behavioural Therapy for Psychosis, including particular areas of emphasis and practice elements associated with this approach                                                                                                                                                                                                                                                                                          | Literature review                | Unknown                           | <p>Relevant data and diagnostic activities Diagnoses Interventions</p> |



---

|                          |                                                                                                                  |                        |                                                                                                                                                                                                     |                                                                       |
|--------------------------|------------------------------------------------------------------------------------------------------------------|------------------------|-----------------------------------------------------------------------------------------------------------------------------------------------------------------------------------------------------|-----------------------------------------------------------------------|
| Suryani et al.<br>(2013) | To identify the experience of auditory hallucinations as articulated by Indonesians diagnosed with schizophrenia | Phenomenological study | (n = 13) participants between 19 to 56 years of age who have been diagnosed with schizophrenia and have experienced auditory hallucinations                                                         | Relevant data and diagnostic activities<br>Diagnoses<br>Interventions |
| Woo et al.<br>(2014)     | Unknown                                                                                                          | Case report            | An 85-year old ethnic Chinese woman with a history of transient ischemic attacks and chronic bilateral hearing impairment, who experienced an acute onset of left unilateral musical hallucinations | Relevant data and diagnostic activities<br>Diagnoses                  |
| Zahodne et al.<br>(2008) | Unknown                                                                                                          | Literature review      | Unknown                                                                                                                                                                                             | Relevant data and diagnostic activities<br>Diagnoses<br>Interventions |

---

---

|                       |                                                                                                                                            |                                  |                                                                                                                                                                                                                                                  |                                                                             |
|-----------------------|--------------------------------------------------------------------------------------------------------------------------------------------|----------------------------------|--------------------------------------------------------------------------------------------------------------------------------------------------------------------------------------------------------------------------------------------------|-----------------------------------------------------------------------------|
| Yang et al.<br>(2015) | To examine the effectiveness<br>of an auditory hallucinatory<br>symptom<br>management program in<br>patients with chronic<br>schizophrenia | Quasi-<br>experimental<br>design | (n = 58) people<br>experiencing<br>schizophrenia with<br>auditory<br>hallucinations<br>from psychiatric<br>inpatient<br>rehabilitation wards<br>in northern Taiwan<br>(n = 29) in the<br>experimental group<br>(n = 29) in the<br>control group. | Relevant data and<br>diagnostic<br>activities<br>Diagnoses<br>Interventions |
|-----------------------|--------------------------------------------------------------------------------------------------------------------------------------------|----------------------------------|--------------------------------------------------------------------------------------------------------------------------------------------------------------------------------------------------------------------------------------------------|-----------------------------------------------------------------------------|

---
